# Supplementary material for: SEPT9_v2, frequently silenced by promoter hypermethylation, exerts anti-tumor functions through inactivation of Wnt/β-catenin signaling pathway via miR92b-3p/FZD10 in nasopharyngeal carcinoma cells
Source: PubMed Central journal article supplement (PMC7059696; doi:10.1186/s13148-020-00833-5), 2020-03-05

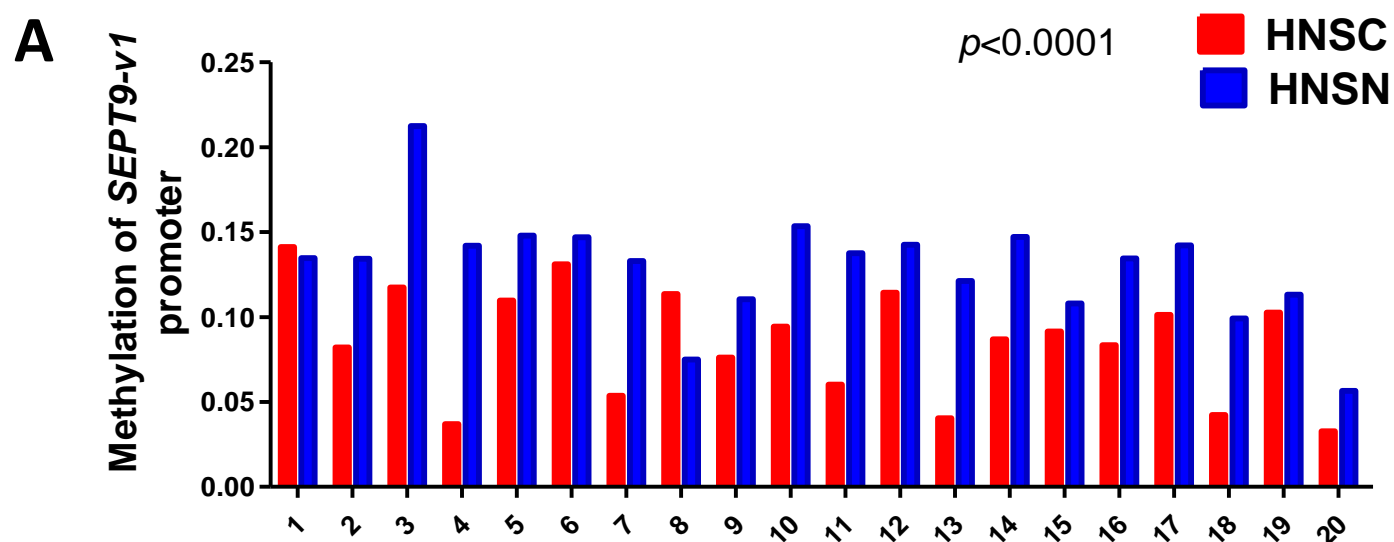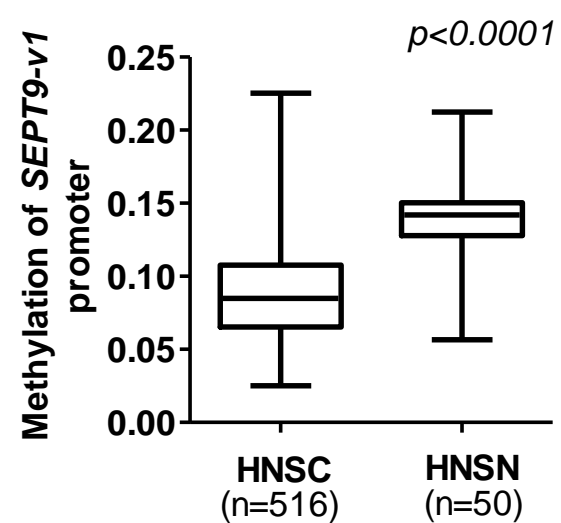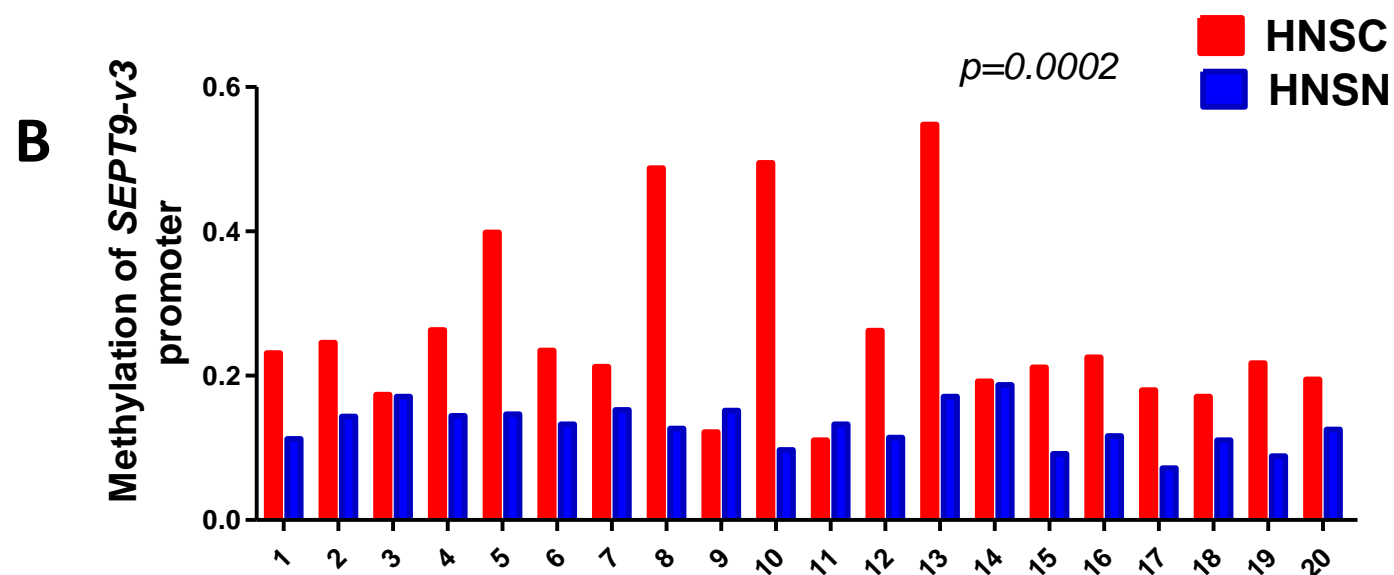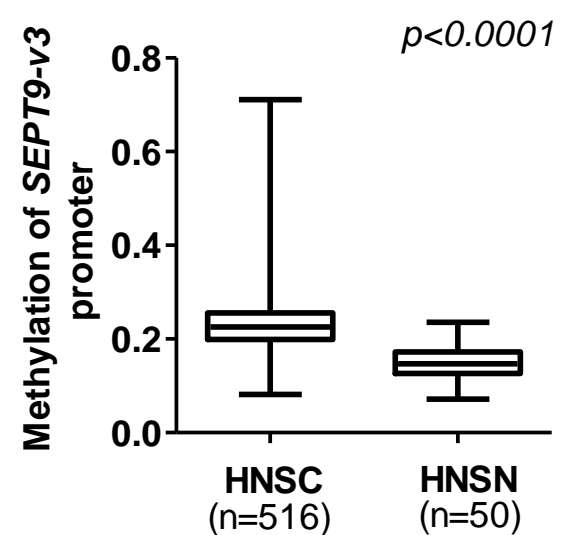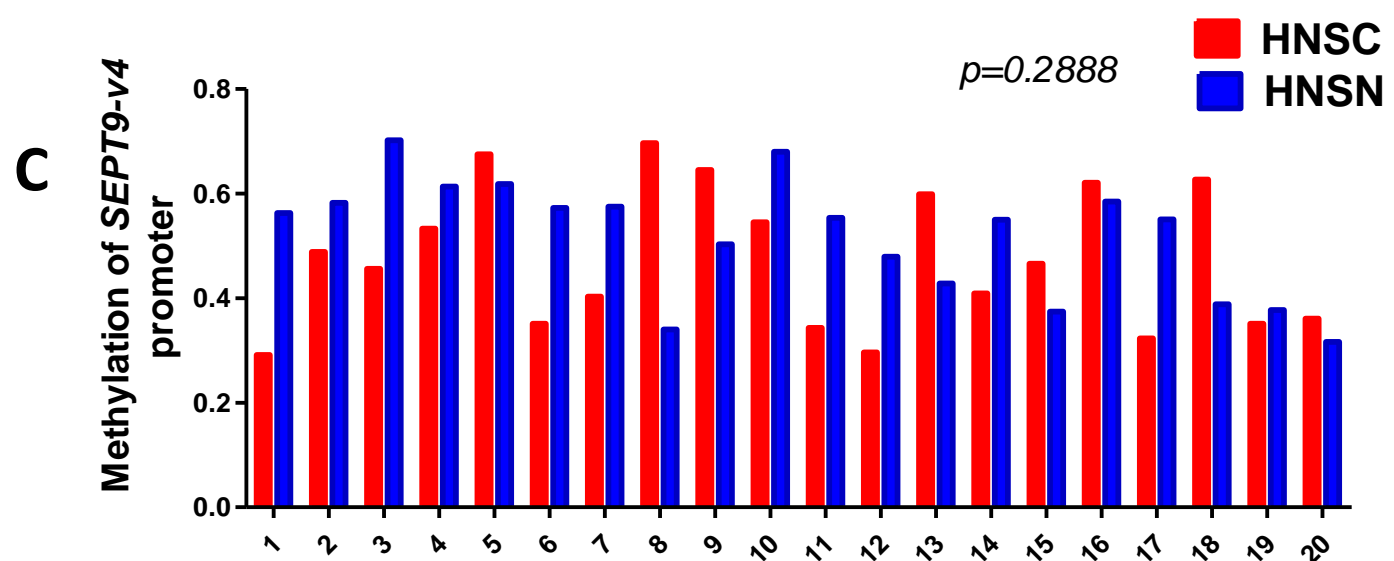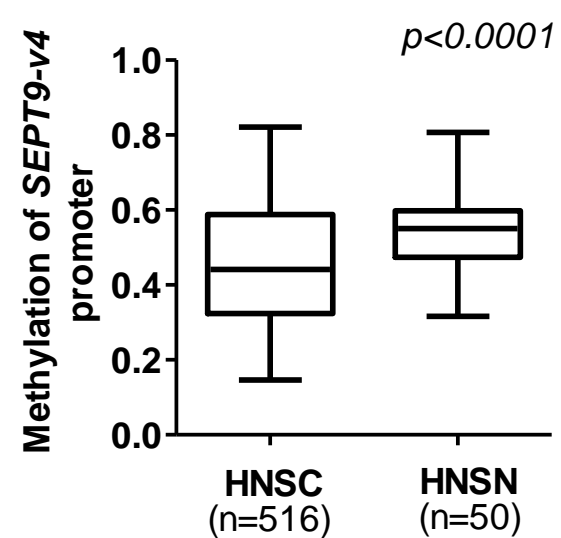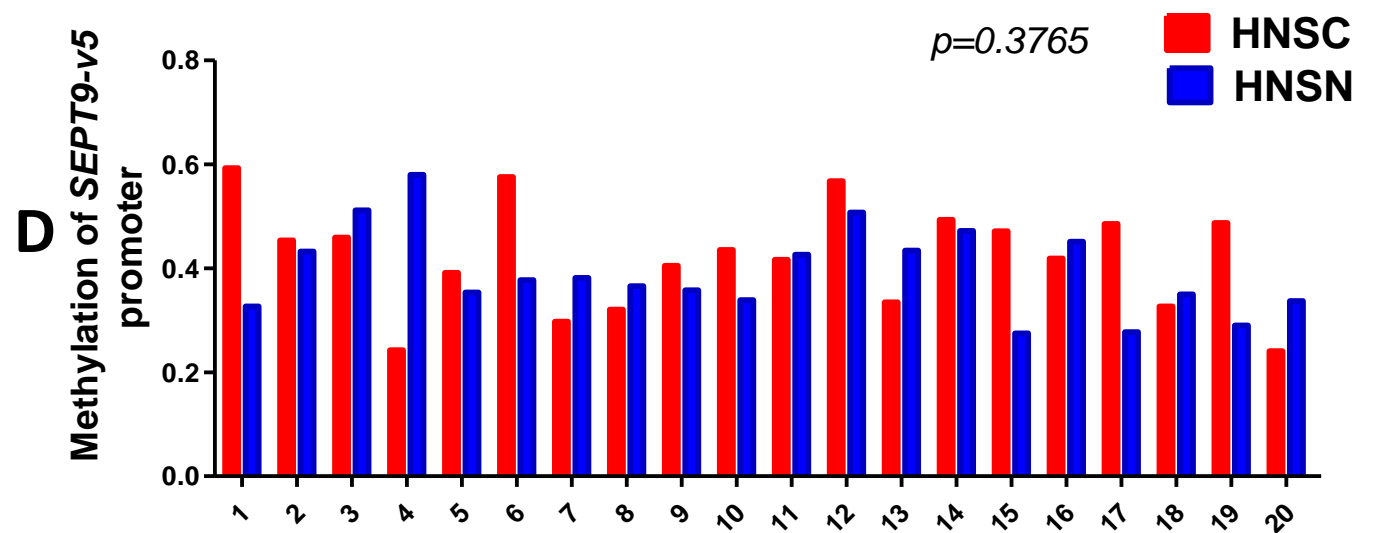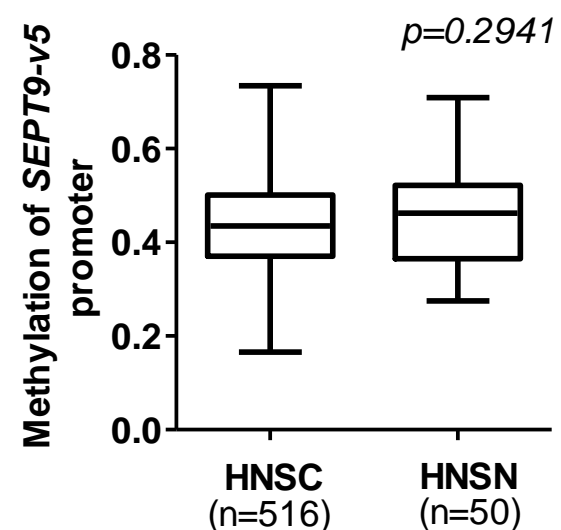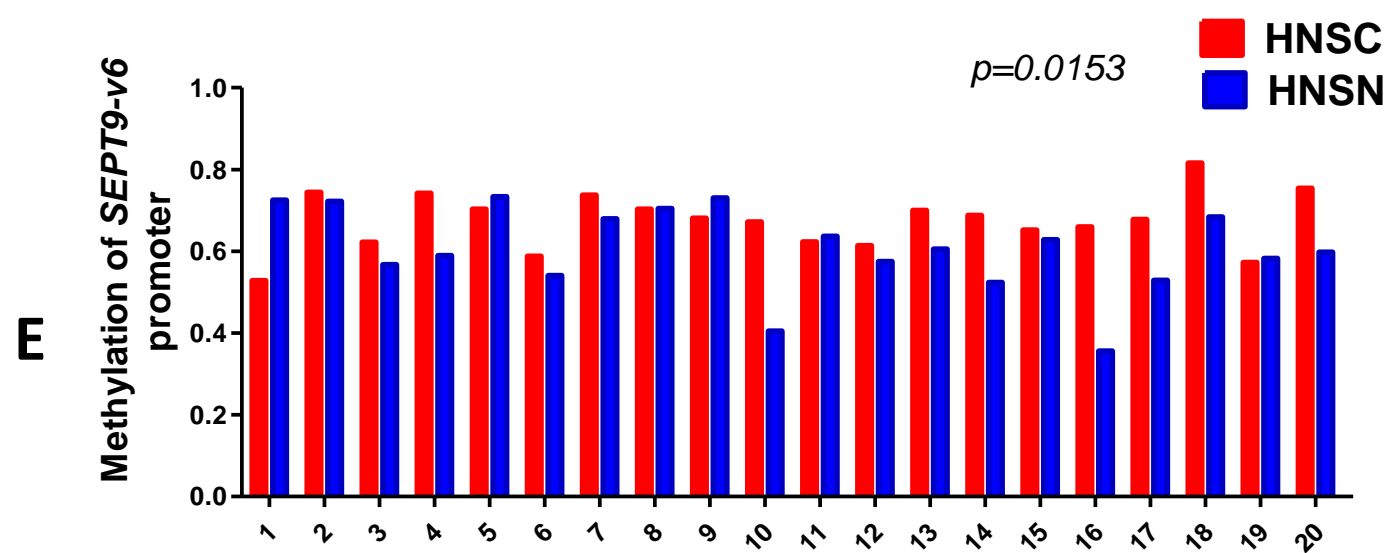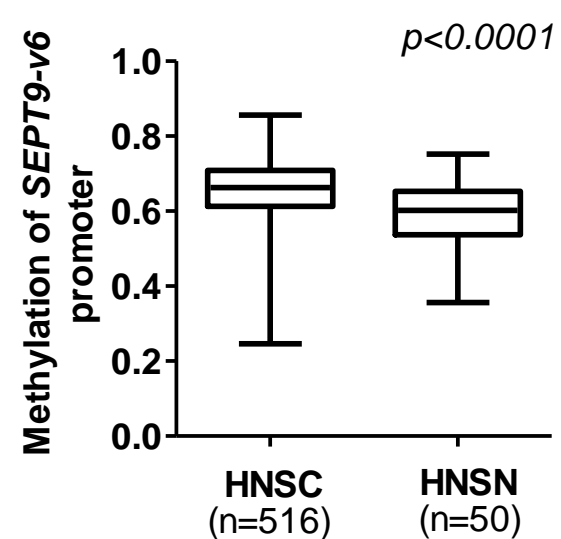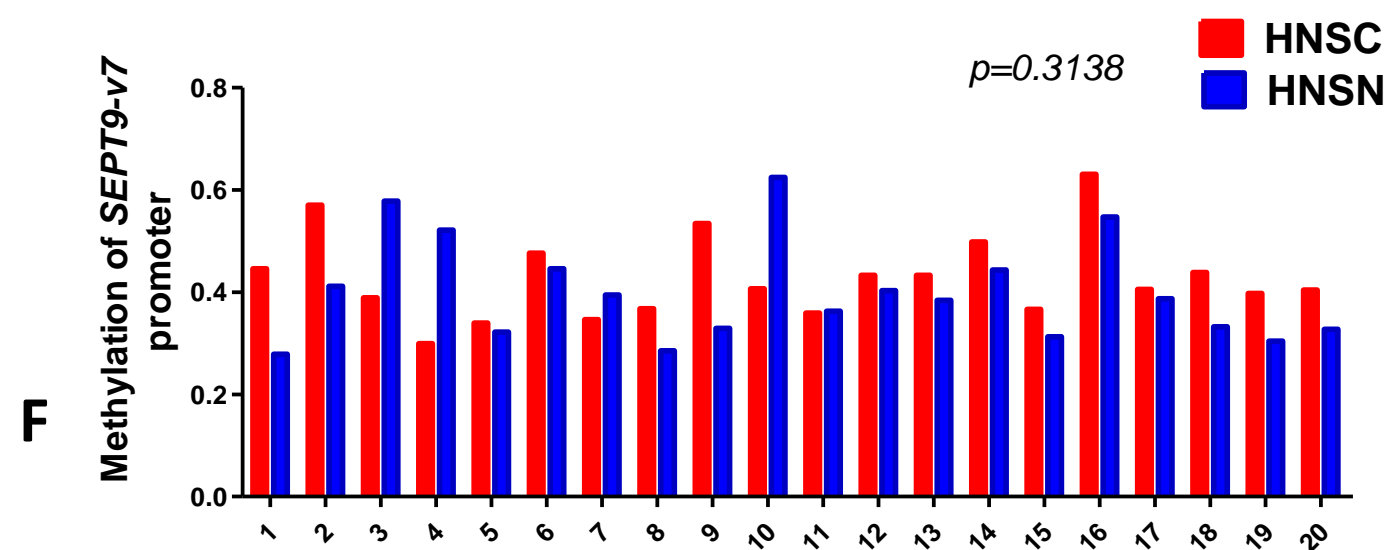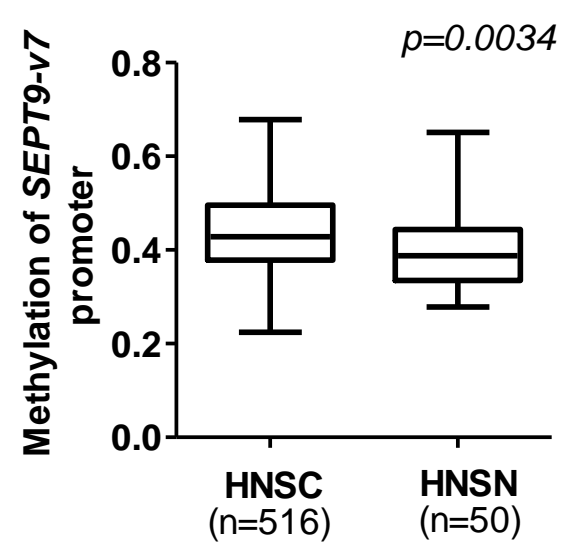

Supplement: 13148_2020_833_MOESM1_ESM.pdf [file 13148_2020_833_MOESM1_ESM.pdf]
